# Supplementary material
Source: Springer Nature journal article supplement (https://www.springermedizin.de/resource/supplementary/12865_2008_240_MOESM1_ESM.pdf/9427580)

**A****M $\phi$  (10)**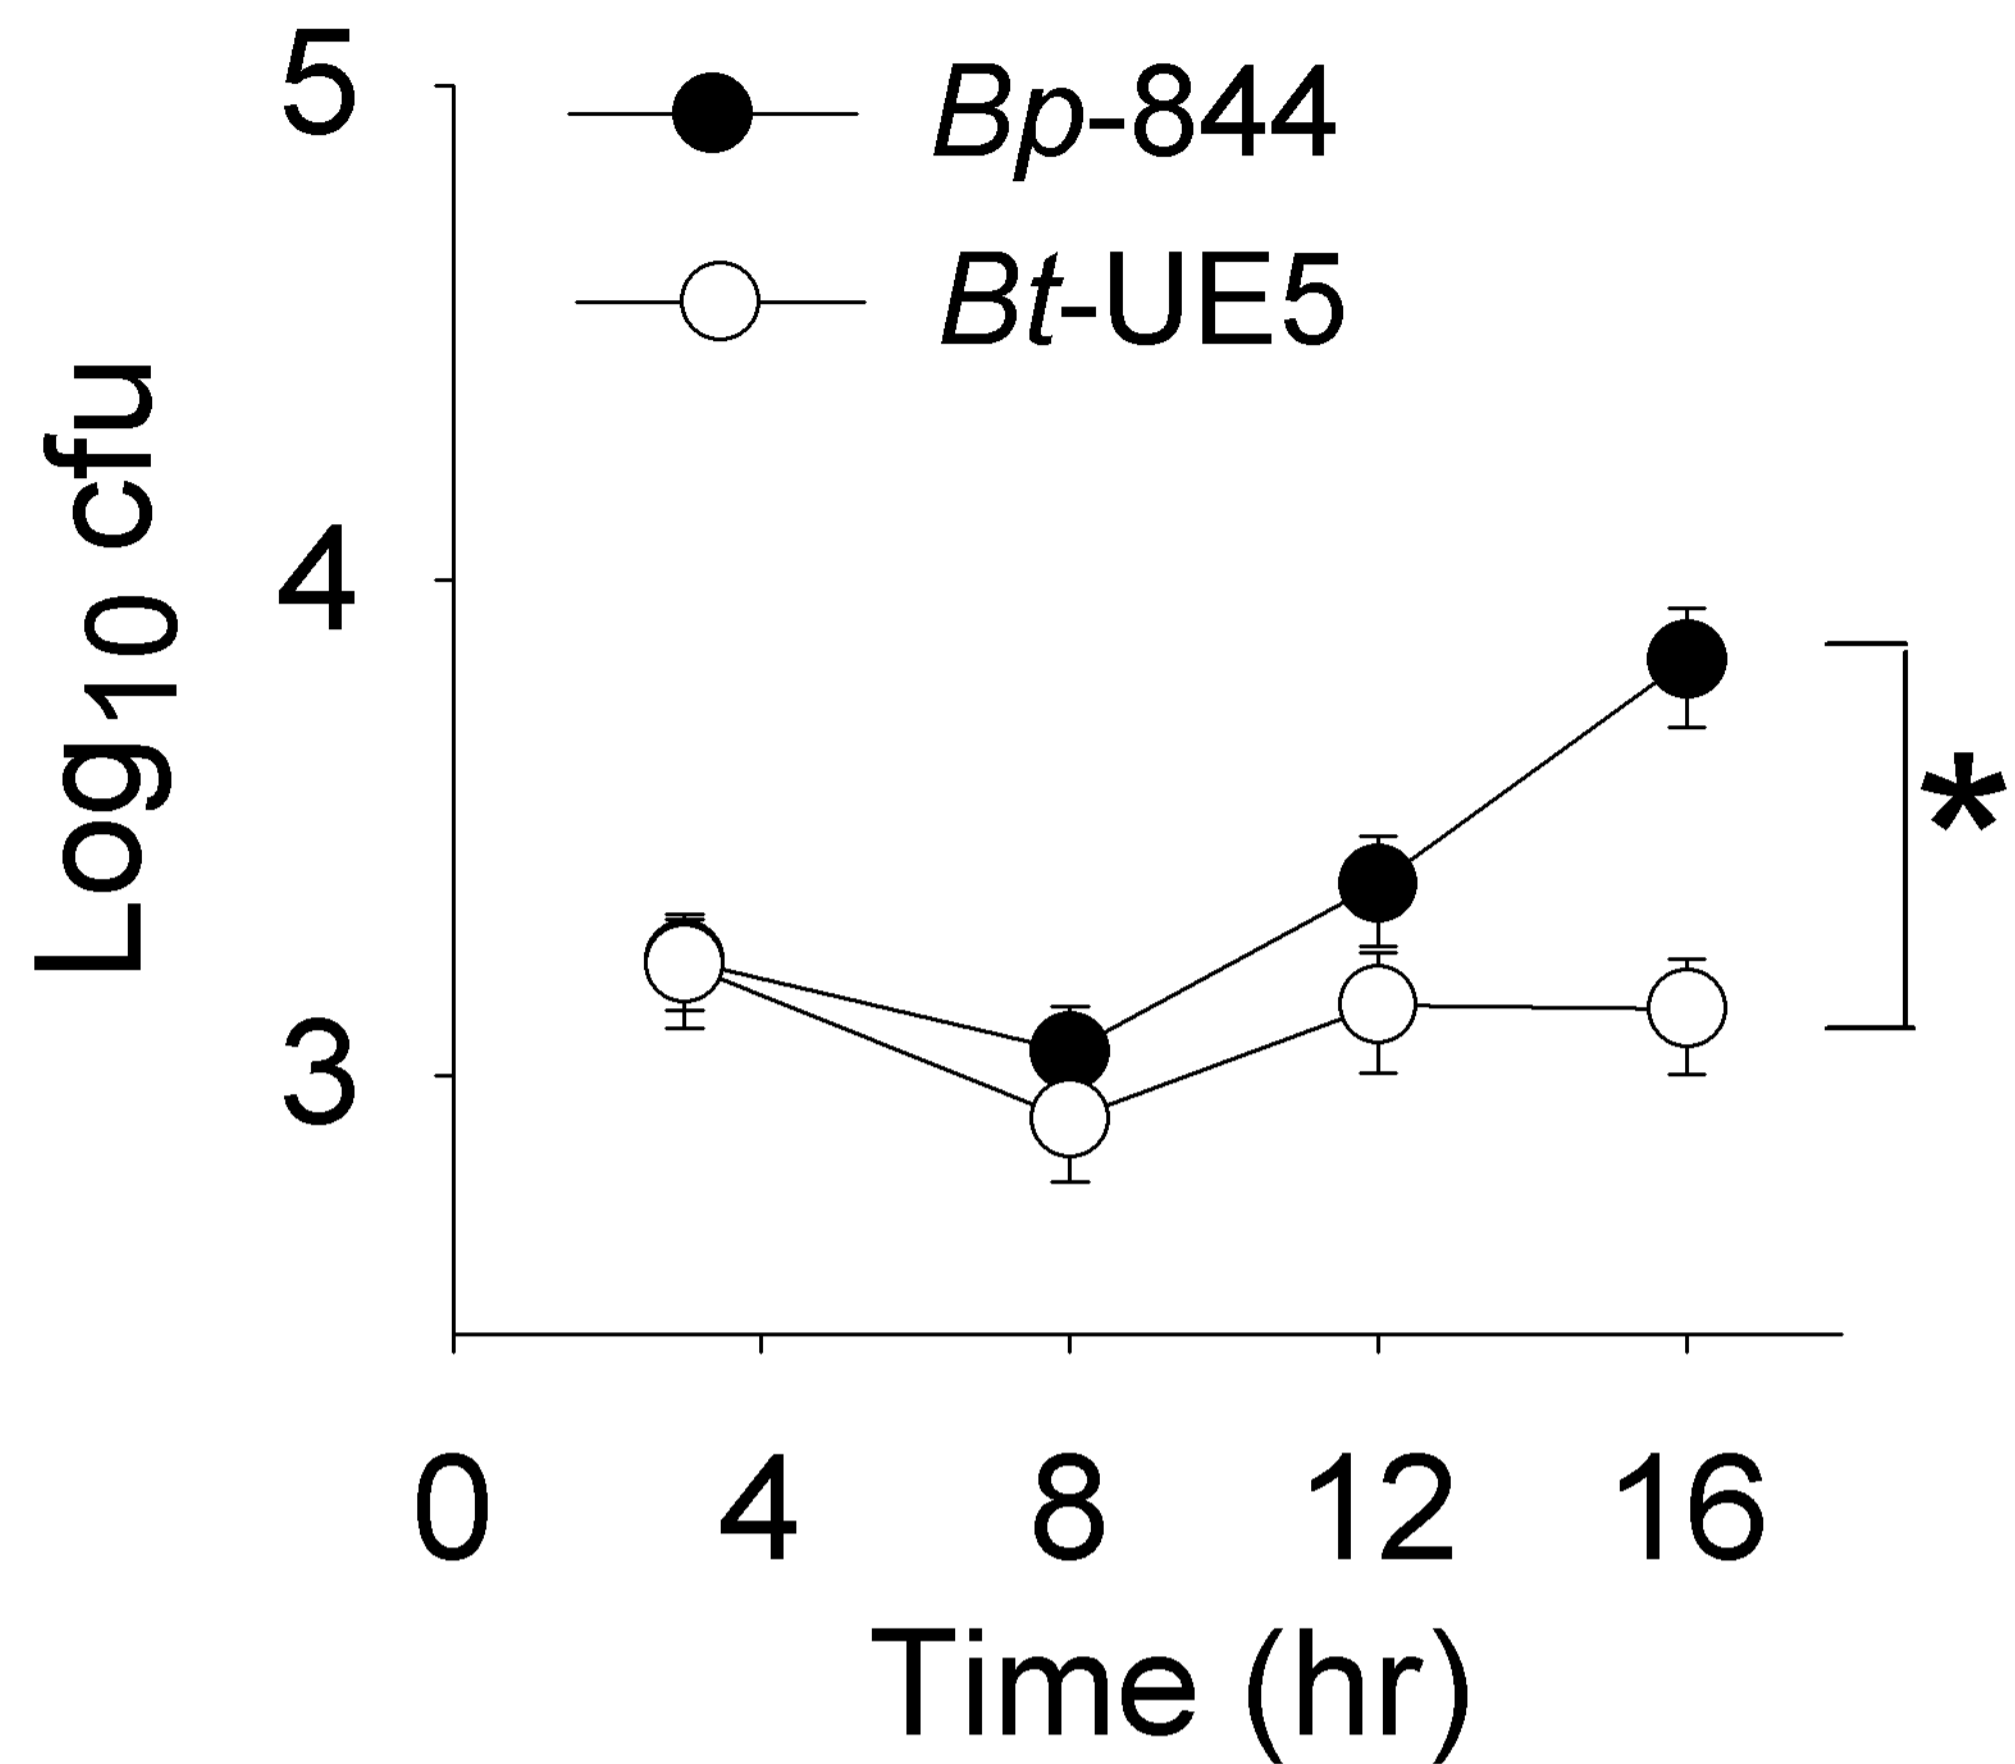**B****MoDC (6)**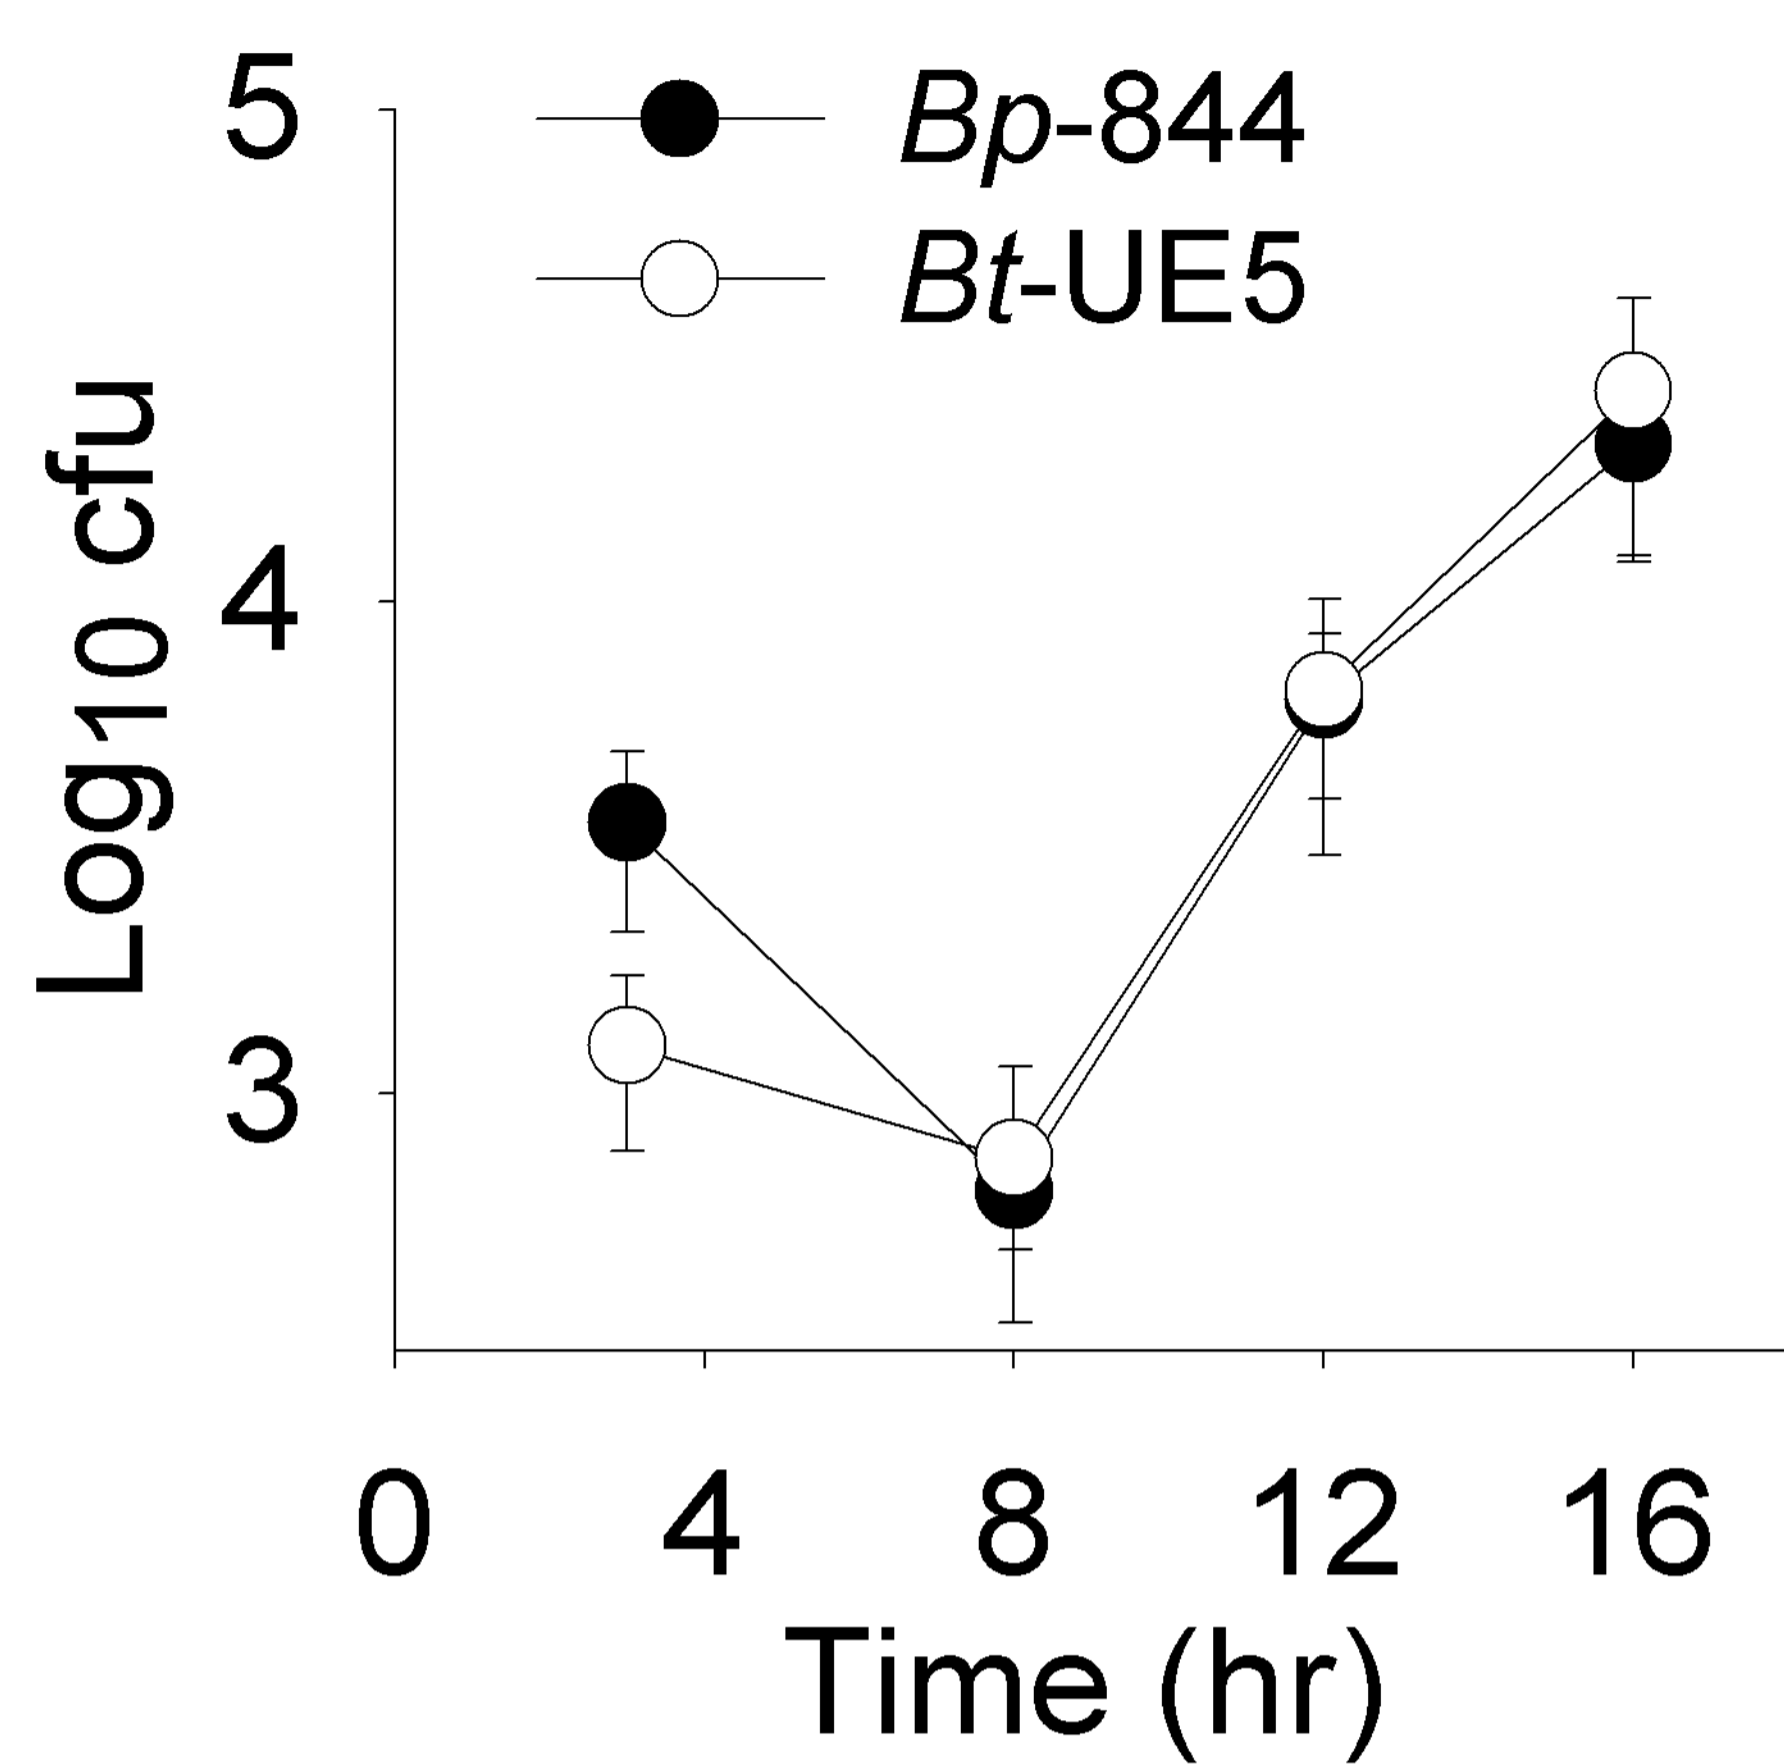**C****M $\phi$  (5)**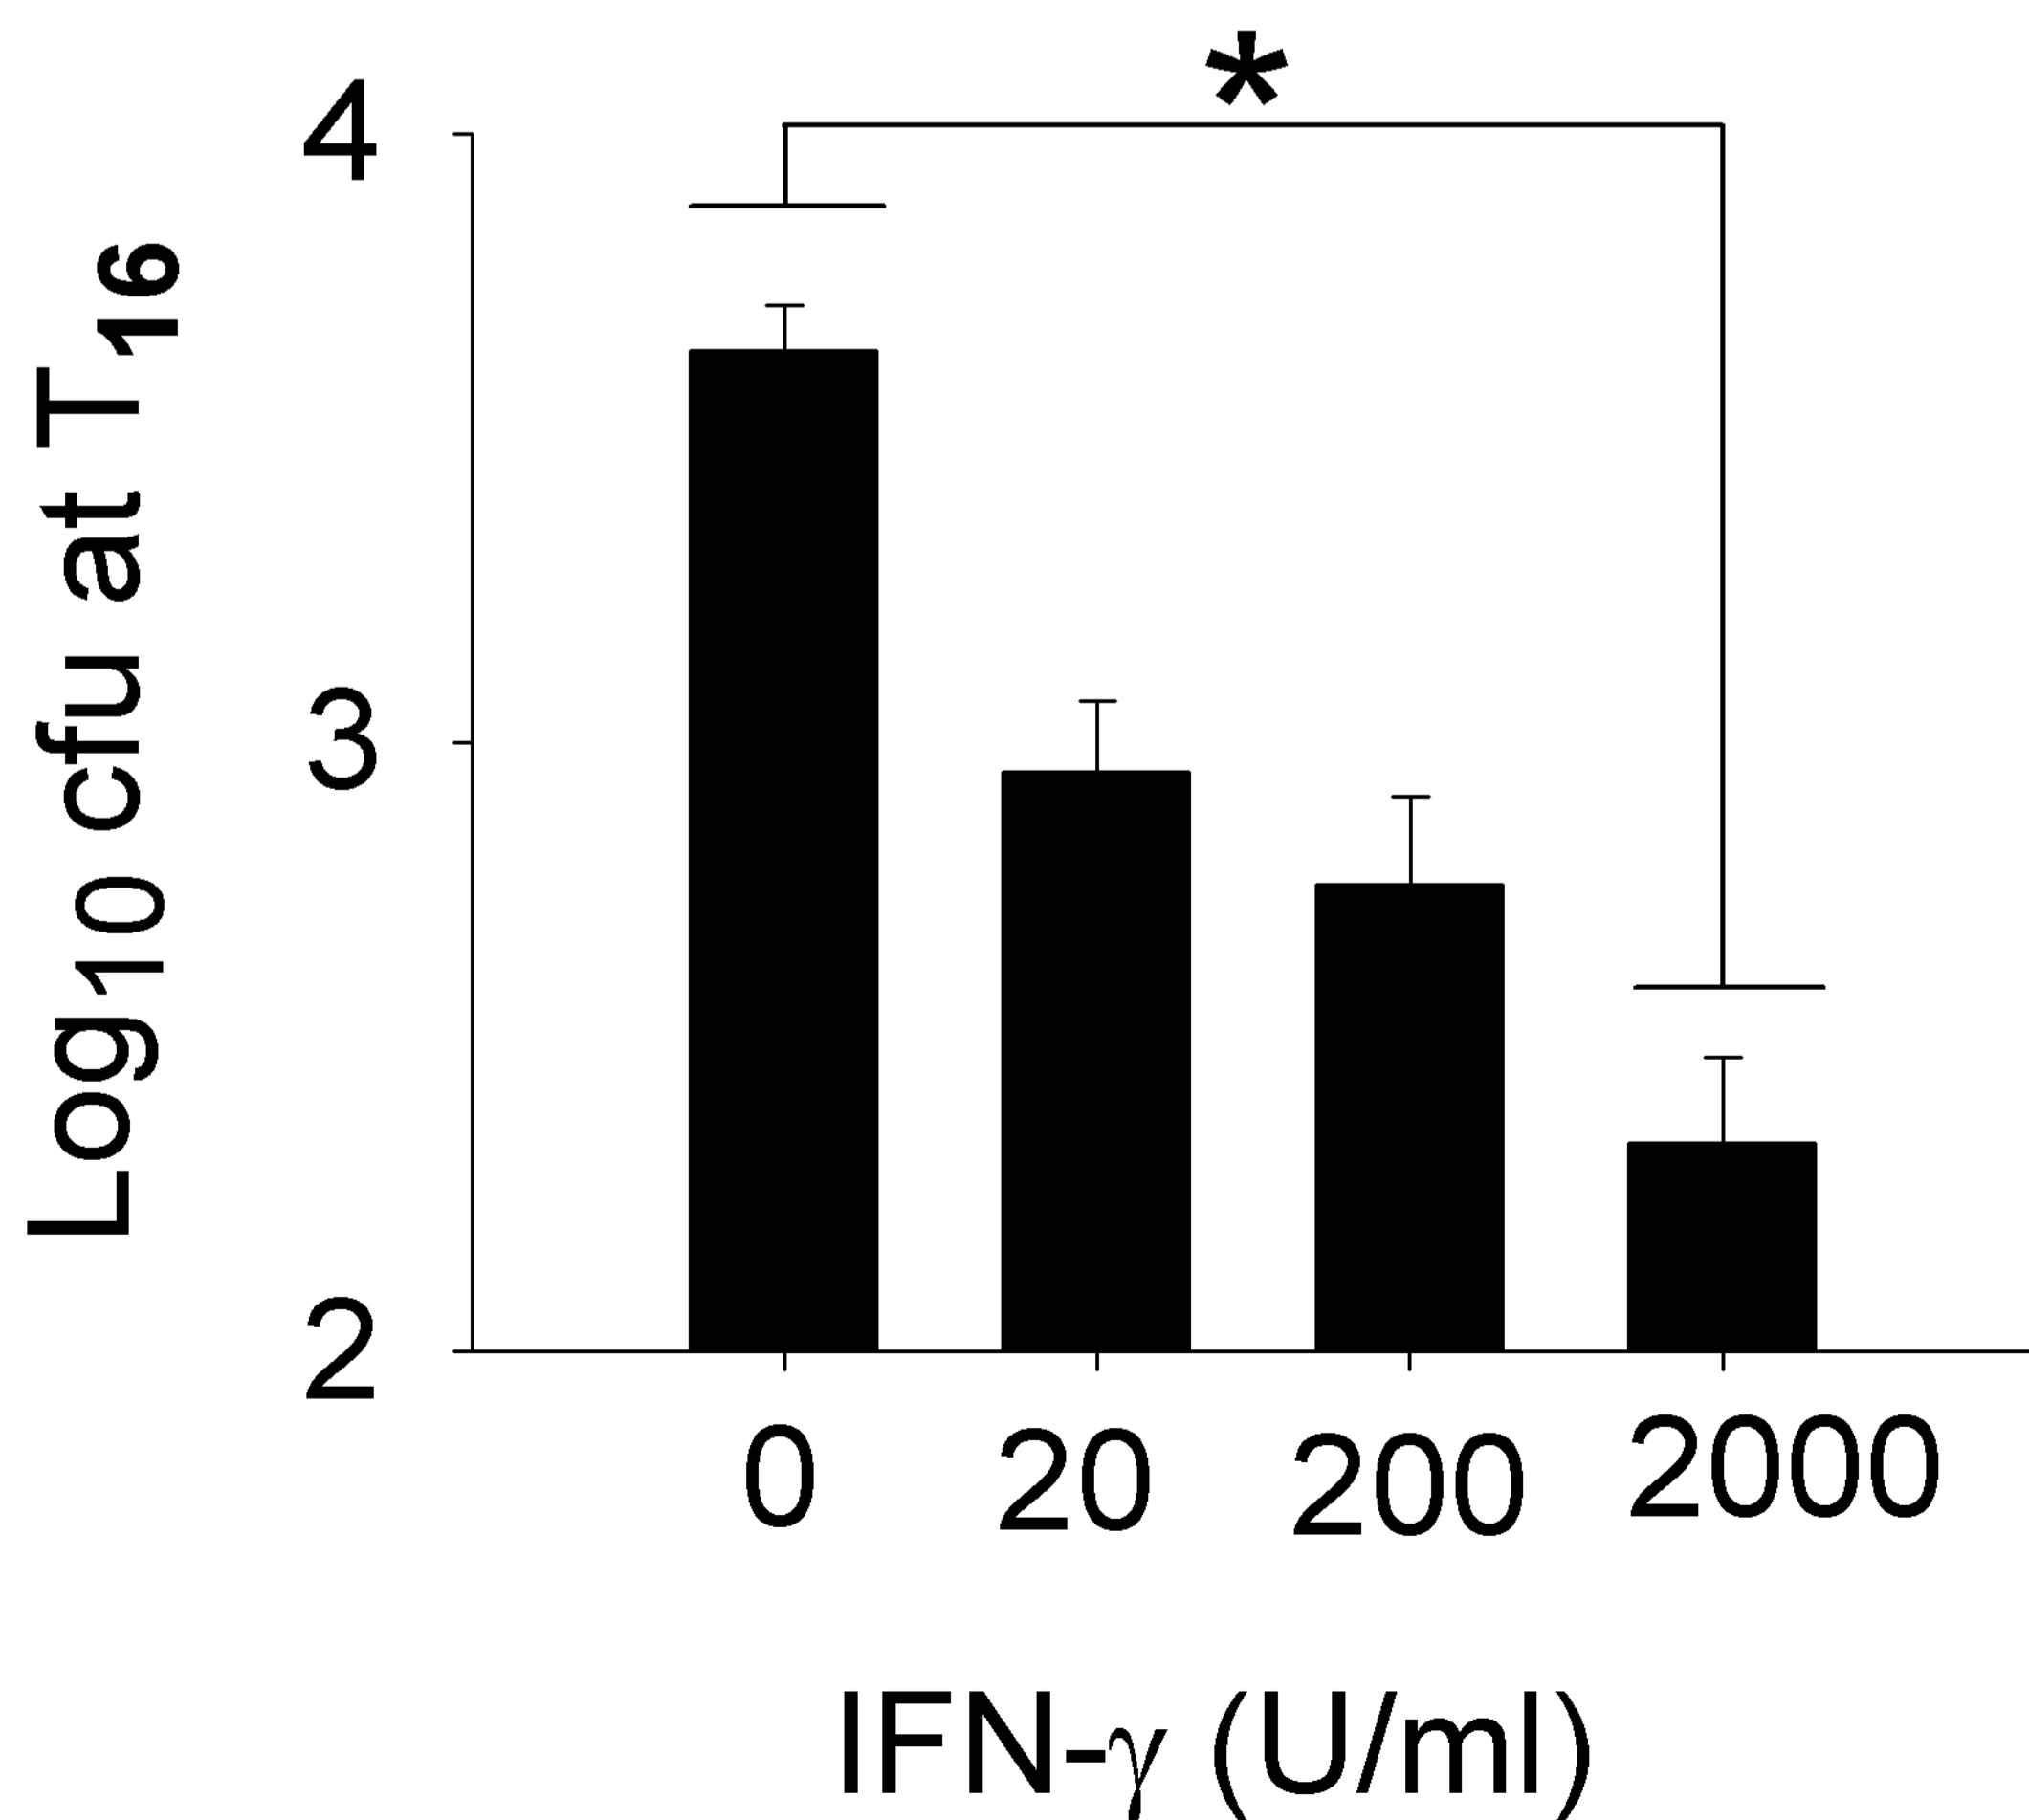**D****MoDC (4)**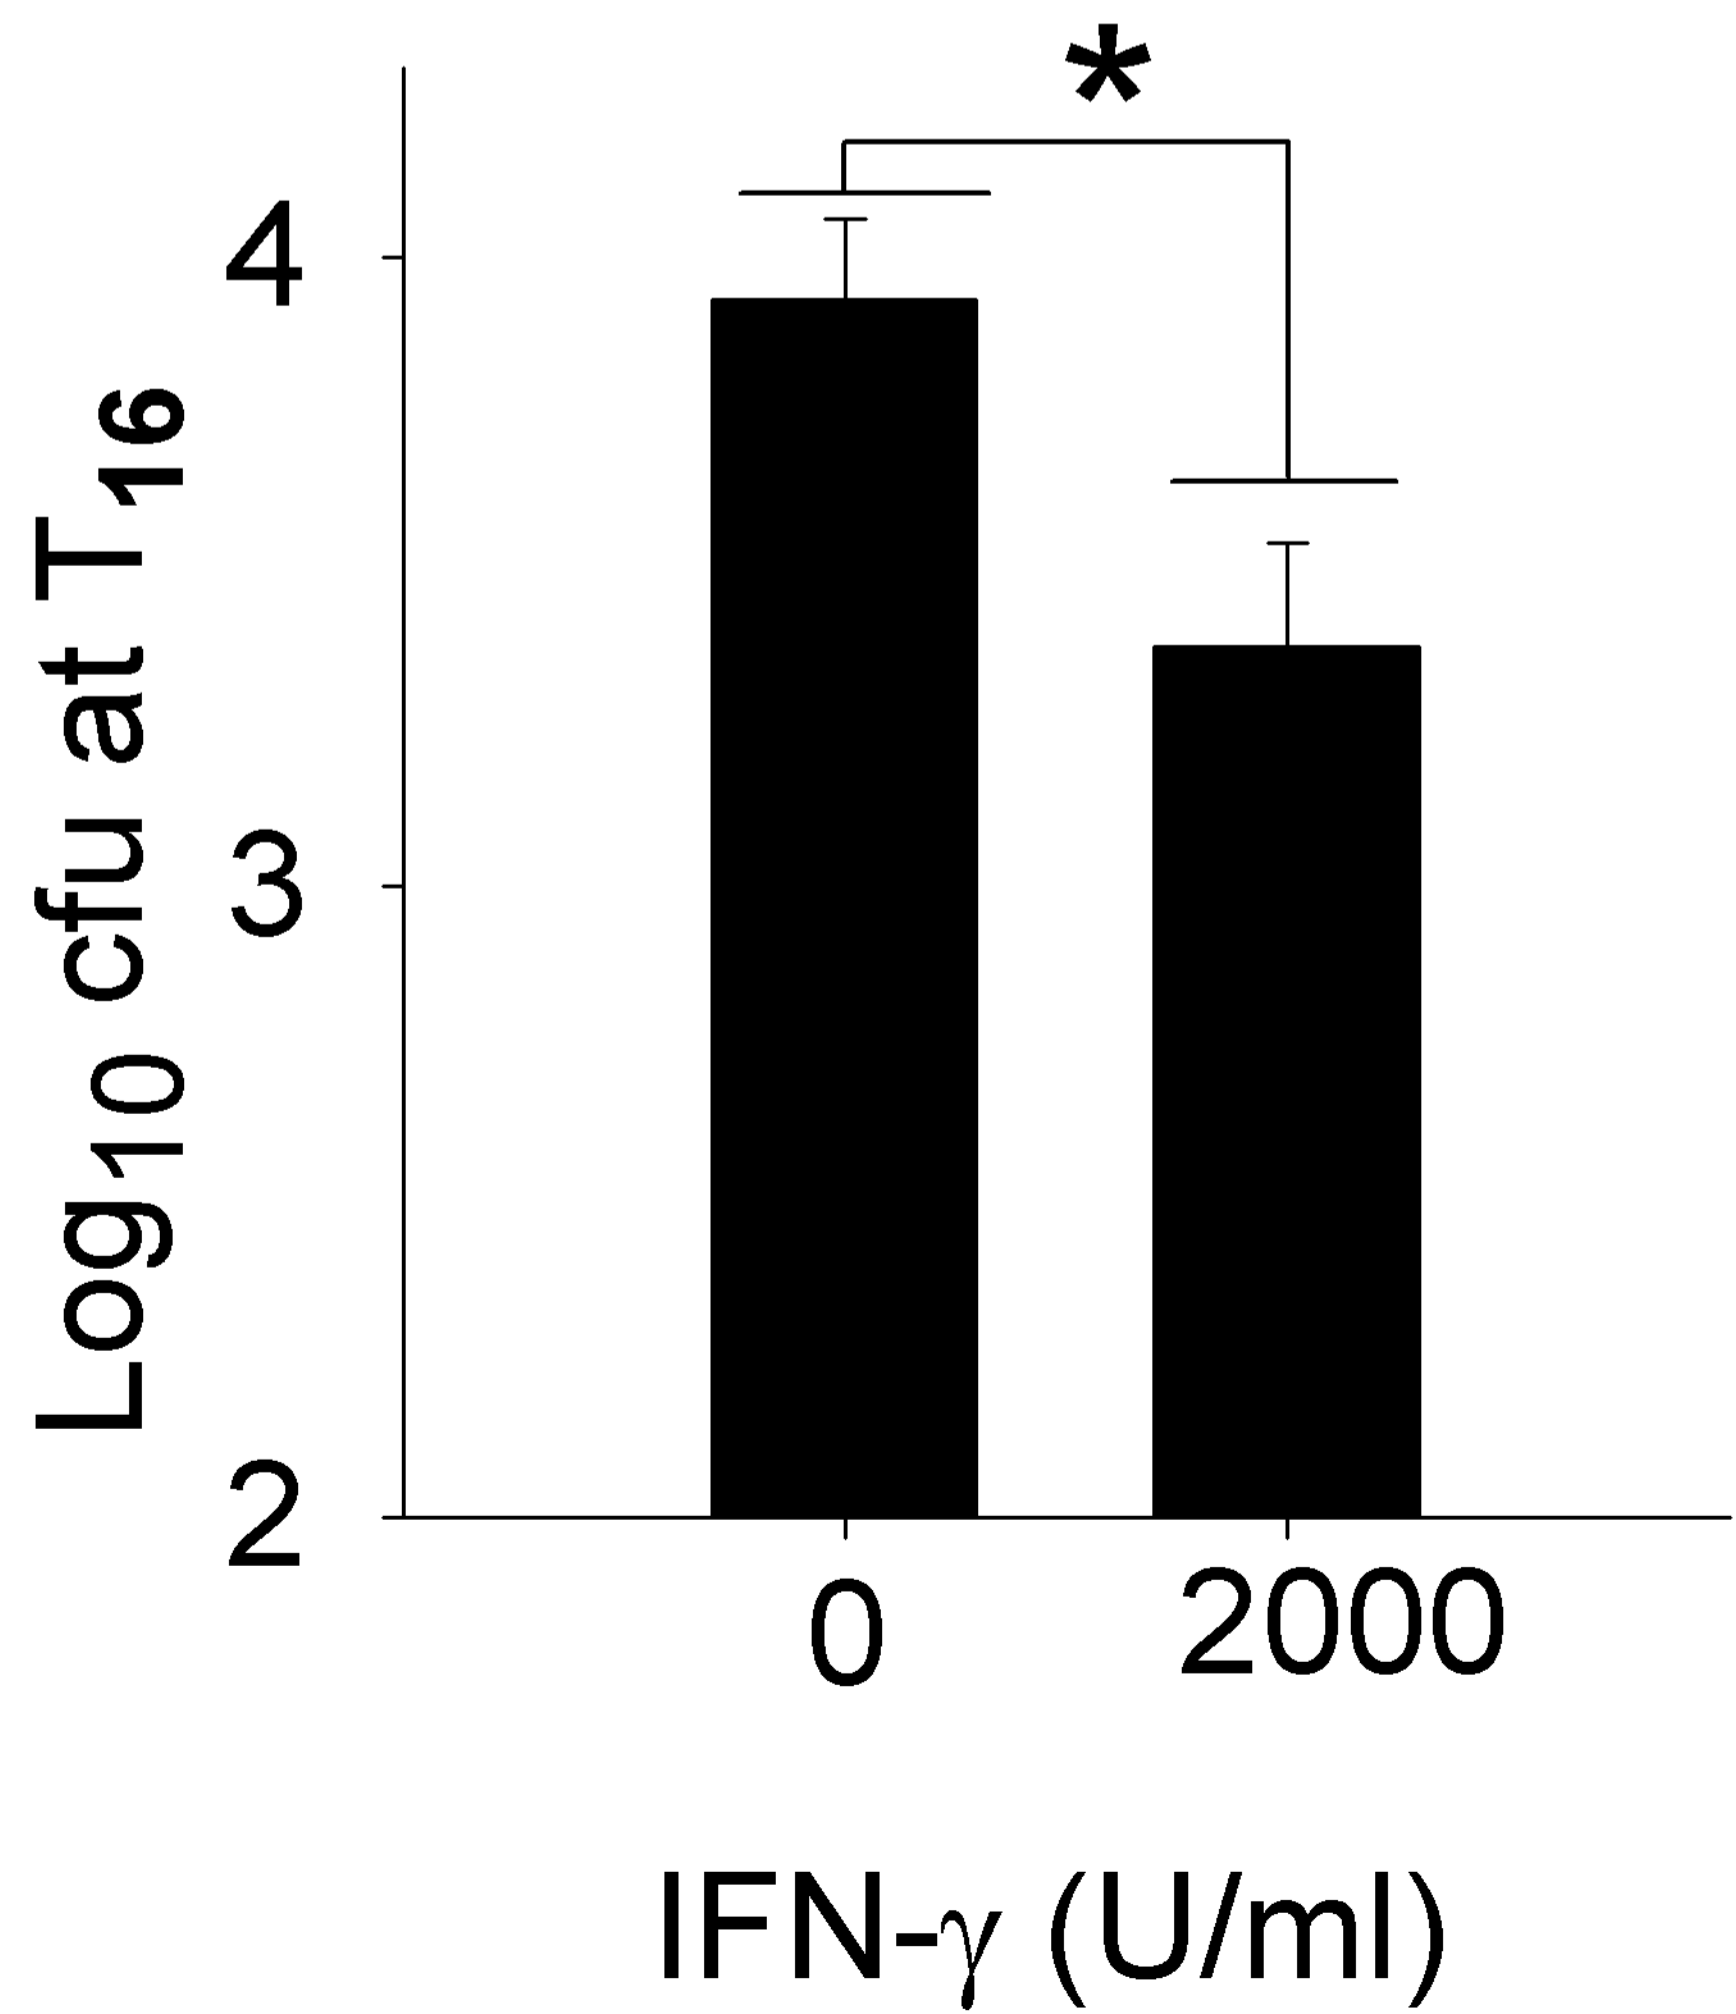

Supplement: MOESM1 [file 9427580]
